# Supplementary material
Source: publisher figshare collection journal article supplement (https://wiley.figshare.com/articles/dataset/_/3568542)
Supplement: Supplementary file 1 [file 1]

# APPENDIZ

## A Notes on Loosmore and Ford's test statistic

### A.1 Sums and integrals

Loosmore and Ford (2006, eq. (3)) propose the test statistic

$$U_{\text{obs}} = \sum_{r_k=r_{\min}}^{r_{\max}} (H_{\text{obs}}(r_k) - H_{\text{theo}}(r_k))^2 \delta r_k \quad (\text{A.1})$$

where  $r_1, \dots, r_N$  is a sequence of distance values at which  $H_{\text{obs}}(r)$  and  $H_{\text{theo}}(r)$  have been computed, and  $\delta r_k = r_{k+1} - r_k$  is the distance increment. For the simulated point patterns the corresponding values are

$$U_i = \sum_{r_k=r_{\min}}^{r_{\max}} (H_i(r_k) - H_{\text{theo}}(r_k))^2 \delta r_k. \quad (\text{A.2})$$

For a finely spaced sequence of distance values, the sum in (A.1) is a close approximation to the *integral*

$$U_{\text{obs}} = \int_{r_{\min}}^{r_{\max}} (H_{\text{obs}}(r) - H_{\text{theo}}(r))^2 dr \quad (\text{A.3})$$

and similarly

$$U_i = \int_{r_{\min}}^{r_{\max}} (H_i(r) - H_{\text{theo}}(r))^2 dr. \quad (\text{A.4})$$

## A.2 Sample means

When the theoretical value  $H_{\text{theo}}(r)$  is not known, Loosmore and Ford (2006) propose replacing  $H_{\text{theo}}(r)$  in (A.1) by the average of the simulated values

$$\bar{H}(r) = \frac{1}{m} \sum_{i=1}^m H_i(r). \quad (\text{A.5})$$

Thus for a fine sequence of  $r$  values the test statistic is

$$U_{\text{obs}} = \int_{r_{\min}}^{r_{\max}} (H_{\text{obs}}(r) - \bar{H}(r))^2 dr. \quad (\text{A.6})$$

To preserve symmetry in the treatment of the observed and simulated data, let us treat the observed point pattern as pattern 0, and write  $H_{\text{obs}}(r)$  as  $H_0(r)$ . Then  $\bar{H}(r)$  is the average of all the functions  $H_i(r)$  *except*  $H_0(r)$ . Symmetry requires that  $H_{\text{theo}}(r)$  in (A.2) should be replaced by

$$H_{-i}(r) = \frac{1}{m} \sum_{j \neq i} H_j(r) \quad (\text{A.7})$$

where the index  $j$  may include 0. Thus

$$U_i = \int_{r_{\min}}^{r_{\max}} (H_i(r) - H_{-i}(r))^2 dr. \quad (\text{A.8})$$

The computation can be simplified by noticing that

$$H_{-i}(r) = \frac{1}{m} \left( \sum_{j=0}^m H_j(r) - H_i(r) \right) = \frac{m+1}{m} \bar{H}(r) - \frac{1}{m} H_i(r) \quad (\text{A.9})$$

where

$$\bar{\bar{H}}(r) = \frac{1}{m+1} \sum_{j=0}^m H_j(r) \quad (\text{A.10})$$

is the average of all the observed and simulated functions. This gives

$$H_i(r) - H_{-i}(r) = H_i(r) - \frac{m+1}{m} \bar{\bar{H}}(r) + \frac{1}{m} H_i(r) = \frac{m+1}{m} \left( H_i(r) - \bar{\bar{H}}(r) \right). \quad (\text{A.11})$$

Thus, the statistic of Loosmore and Ford (2006) is equivalent to

$$U_{\text{obs}} = a \int_{r_{\min}}^{r_{\max}} (H_{\text{obs}}(r) - \bar{\bar{H}}(r))^2 \mathrm{d}r \quad (\text{A.12})$$

$$U_i = a \int_{r_{\min}}^{r_{\max}} (H_i(r) - \bar{\bar{H}}(r))^2 \mathrm{d}r \quad (\text{A.13})$$

where  $a = ((m+1)/m)^2$  and

$$\bar{\bar{H}}(r) = \frac{m}{m+1} \bar{H}(r) + \frac{1}{m+1} H_{\text{obs}}(r) \quad (\text{A.14})$$

is the average of all the simulated and observed values. This reduces the computational load because it does not require calculation of  $H_{-i}(r)$  for each  $i$ .

## Literature cited

Loosmore, N. B., and E. D. Ford. 2006. Statistical inference using the G or K point pattern spatial statistics. *Ecology* 87:1925–1931.
